# **Biogeography and Edaphic Factors Structure Coastal Sediment Microbial Communities More than Vegetation Removal by Sudden Vegetation Dieback**

Courtney Gorham<sup>a</sup>, Aidan Barry<sup>b</sup>, Beth A. Lawrence<sup>b</sup>, Blaire Steven<sup>a#</sup>

<sup>a</sup>Department of Environmental Sciences, Connecticut Agricultural Experiment Station, New Haven, CT, USA

<sup>b</sup>Department of Natural Resources and the Environment, Center for Environmental Science and Engineering, University of Connecticut, Storrs, CT, USA

**Running Title:** Microbial Biogeography of Sudden Vegetation Dieback

<sup>#</sup>Corresponding author. Department of Environmental Sciences, Connecticut Agricultural Experiment Station. 123, Huntington Street, New Haven, CT. 06511.  
blaire.steven@ct.gov

1 **Abstract** (250 words)

2           Development of sudden vegetation dieback (SVD), a phenomenon that causes  
3 the rapid mortality of salt marsh plants, specifically *Spartina alterniflora*, has  
4 affected large-scale alterations in Atlantic coastal systems, through the often-  
5 complete removal of vegetation. In this study, two wetlands that differ in the time  
6 since development of SVD were compared in order to study biogeographic and  
7 temporal patterns that structure coastal wetland microbial communities and their  
8 response to disturbance.

9           Biogeographic and edaphic factors that distinguished the two wetlands, such  
10 as differing salinity, water content, and soil carbon and nitrogen between the sites  
11 were more strongly associated with sediment microbial community structure than  
12 either sampling date or SVD development. In fact, no OTUs differed in abundance  
13 due to the season samples were collected, or vegetation loss due to SVD. This is not  
14 to say that SVD did not alter the composition of the microbial communities. The  
15 taxonomic composition of sediment communities in SVD-affected sediments was  
16 more heterogeneous between samples and a small number of OTUs were enriched  
17 in the vegetated sediments. Yet, these data suggest that coastal wetland sediment  
18 communities are predominantly shaped by environmental conditions and are  
19 generally resilient to temporal cycles or ecosystem disturbances.

20

21 **Importance** (150 words)

22           One of the challenges of microbial ecology is predicting how microbial  
23 communities will respond to ecosystem change. Yet, few studies have addressed whether

24 microbial responses to disturbance are consistent over space or time. In this study we  
25 employ SVD as a natural vegetation removal experiment and compare the sediment  
26 microbial communities between two geographically separated wetlands (*ca* 125 km). In  
27 this manner, we uncover a hierarchical structuring of the microbial communities, being  
28 predominantly governed by biogeography, with lesser effects due to disturbance, or  
29 temporal dynamics.

## 30 **Introduction**

31 Coastal ecosystems are among the most productive on earth and have the potential  
32 to sequester and store carbon at rates of up to 50 times higher than other terrestrial  
33 ecosystems (1). The potency of coastal ecosystems as carbon sinks is attributable to their  
34 high primary productivity, as they can produce 40% more plant biomass annually than  
35 the same area of forest (2, 3). This plant fixed carbon is eventually delivered to the  
36 wetland sediments through litter, root exudates, or plant mortality, eventually becoming  
37 the substrate for microbial metabolism (4, 5). A defining feature of wetlands is periods of  
38 water saturation, with flooded sediments rapidly become anoxic. Anaerobic degradation  
39 of organic matter happens relatively slowly, and the rate of organic inputs from the  
40 vegetation occurs at a greater rate than losses by microbial respiration, resulting in a net  
41 accumulation of carbon in wetland sediments (6, 7). This stored carbon in coastal  
42 wetlands has been referred to as “blue carbon” and is an important component to  
43 mitigating the atmospheric carbon concentrations that are driving climate change (1, 8–  
44 10).

45 Coastal wetlands along the eastern coast of North America are experiencing  
46 sudden vegetation dieback (SVD), a phenomenon affecting low elevation salt marshes  
47 dominated by smooth cordgrass (*Spartina alterniflora*). SVD presents as an initial  
48 browning and thinning of the vegetation, with plant mortality occurring in periods as  
49 short as weeks (11, 12). Propagative rhizomes are killed by SVD, limiting plant regrowth  
50 and resulting in unvegetated patches that may remain for decades (11). Patches of SVD  
51 have been found to range from 300 m<sup>2</sup> to 5 km<sup>2</sup> with 50 to 100% plant mortality (13).  
52 The etiology of SVD remains controversial; fungal pathogens (14, 15), invasive crabs

53 (16, 17), and drought (17) have been proposed as the cause, and likely interact or at least  
54 contribute to the development of SVD. Regional differences or complex interactions  
55 between factors may play a role in the difficulty in identifying a unified explanation of  
56 SVD development (18). The lack of an explanatory model for SVD development has  
57 driven most research to address the causes of SVD rather than the consequences of the  
58 loss of vegetation on the functioning of wetland ecosystems.

59 We previously documented that sediment microbial communities differed  
60 between SVD-affected sediments and stands of healthy *S. alterniflora* at a coastal marsh  
61 in Connecticut, U.S.A (19). SVD-affected sediments harbored reduced populations of  
62 bacteria in the phylum *Bacteroidetes*, whereas populations of sulfur-reducing bacteria  
63 (predominantly within the genus *Desulfobulbus*) were enriched in the SVD-affected  
64 sediments. Additionally, the SVD-affected patches supported 64% reduced CO<sub>2</sub>  
65 emissions compared to healthy vegetated controls (19). Taken together, these  
66 observations indicate that SVD resulted in alterations in both the structure and function of  
67 sediment microbial communities. Yet, there is little known regarding the spatial or  
68 temporal scales at which the shifts in the microbial communities occur, or whether  
69 alterations in sediment microbial communities are similar between geographically  
70 isolated wetlands.

71 In the present study, we compared sediment microbial communities between two  
72 salt marshes both experiencing current outbreaks of SVD. However, the time since SVD  
73 development differed between the two sites (5 versus. 10 years). To examine the relative  
74 role of vegetation, we examined sediment microbial communities in summer (July)  
75 during peak plant activity, and in fall (October) when salt marsh plants begin senescence.

76 We predicted that the microbial communities would differ between the two field sites due  
77 to biogeography, but would show similar responses to SVD, such that the sites  
78 experiencing SVD would potentially be more similar to each other than they were to  
79 healthy locations at the same field site. We further expected that the sediment microbial  
80 communities response to SVD would be muted in fall sampling, when plants in the  
81 vegetated plots were not active and producing root exudates for the microbial  
82 populations. In this manner, alterations in the coastal wetland sediment communities  
83 could be linked to spatial biogeography, and to temporal dynamics related to the time  
84 from disturbance, and seasonal plant activity.

85

## 86 **Results**

### 87 *Site descriptions*

88 Sediment samples were collected in 2015 from Hammonasset Beach State Park  
89 (hereafter referred to as Hammonasset) on July 22<sup>nd</sup> and October 8<sup>th</sup> of 2015 and at  
90 Narragansett Bay National Estuarine Research Reserve (hereafter referred to as  
91 Narragansett) on July and October 13<sup>th</sup>. The two sites are separated by *ca.* 125 km (Fig.  
92 1A). All sampling was performed at low tide, as this is the only period where SVD  
93 sediments are exposed for collection (Fig. 1B).

94 The dominant vegetation at both sites is *S. alterniflora* and both sites have  
95 unvegetated patches due to SVD. At Hammonasset, outbreaks of SVD were first  
96 documented in 1999 and many patches have remained unvegetated since. At  
97 Narragansett, SVD was first reported in 2010 and represents a more recent occurrence of  
98 SVD. At each site, we established three transects perpendicular to tidal creeks, and

99 sampled sediments at three locations (Fig. 1B,C): in SVD patches adjacent to tidal creeks  
100 (“SVD”), in the transitional edge where vegetation was first encountered (“Edge”), and in  
101 healthy, well-established stands of *S. alterniflora* ca. 1 m from the edge sample  
102 (“Healthy”; Fig. 1C). Thus, samples differ in both their vegetation status and in their  
103 spatial relationship to the local tidal creeks. Together, we collected 18 sediment samples  
104 (2 sites x 3 transects x 3 locations) during each of the summer and fall sampling  
105 campaigns.

106

### 107 *Sediment chemistry*

108 The two sites differed significantly ( $P < 0.05$ ) in all sediment chemistry variables  
109 except pH ( $F_{1,31} = 3.9$ ,  $P = 0.056$ ). In general, Narragansett had higher soil electrical  
110 conductivity (EC;  $F_{1,31} = 6.3$ ,  $P = 0.017$ ), soil moisture ( $F_{1,31} = 141.7$ ,  $P < 0.001$ ), soil %C  
111 ( $F_{1,31} = 199.9$ ,  $P < 0.001$ ) and %N ( $F_{1,31} = 292.3$ ,  $P < 0.001$ ), but a lower soil C:N than  
112 Hammonasset ( $F_{1,24} = 38.0$ ,  $P < 0.001$ ; Table 1). None of the measured sediment  
113 variables differed among vegetation zones nor season ( $P > 0.05$ ). However, we observed  
114 an interaction between site and season of sampling in C:N ratios ( $F_{1,24} = 8.5$ ,  $P = 0.007$ ),  
115 where the Narragansett sediments had greater C:N during the summer sampling than the  
116 Hammonasset wetland, but had greater C:N when sampled in the fall.

117

### 118 *Relationship between sequence datasets*

119 Constrained Analysis of Principal Coordinates (CAP) ordination was used to  
120 investigate patterns in the relationships between the sequence datasets. The samples from  
121 the two field sites were clearly distinguished (Fig. 2; PERMANOVA  $P = 0.001$ ),

122 suggesting that the sediment microbial communities were significantly different between  
123 the two wetlands. Vegetation status was also associated with a significant difference in  
124 clustering of the datasets (PERMANOVA  $P=0.028$ ). Furthermore, the interaction  
125 between the date of sampling and vegetation status was not significant ( $P=0.995$ ),  
126 suggesting that the date of sampling did not influence the microbial community  
127 composition associated with the different vegetation conditions. Date of sampling was  
128 not significant factor in sample clustering ( $P = 0.20$ ). Taken together, these data suggest  
129 that coastal sediment microbial community composition is primarily structured by the  
130 edaphic factors associated with biogeography, followed by vegetation removal by SVD,  
131 with a very small contribution of sampling date.

132

### 133 *Microbial diversity*

134 To measure alpha diversity, the datasets were rarified to the same number of  
135 sequences (7,689) and three diversity metrics were calculated, the number of observed  
136 OTUs, Shannon's diversity index, and inverse Simpson's index (Fig. 3). The average  
137 number of OTUs recovered from the Hammonasset samples was 4,594 ( $\pm 521$ ) and 4,636  
138 ( $\pm 378$ ) for Narragansett. The Shannon's diversity index for both Hammonasset and  
139 Narragansett samples was 7.95, and the inverse Simpson's index was 983 for  
140 Hammonasset and 895 for Narragansett (Fig. 3). Furthermore, there was no apparent  
141 diversity pattern between samples collected during different seasons or from different  
142 vegetation zones. Together, these data indicate that sediment microbial diversity was not  
143 affected by biogeography, date of sampling, or vegetation status.

144



145 *Taxonomic composition of datasets*

146           Sequence reads were classified to the phylum level to compare the composition of  
147 the bacterial communities between the sites (Fig. 4). In general, phyla were present at the  
148 two sites in similar proportions. For example, at both sites the two dominant identified  
149 phyla were Proteobacteria and Bacteroidetes (Fig. 4). Both sites also harbored a relatively  
150 large proportion unclassified bacterial sequences, suggesting a large fraction of  
151 uncharacterized bacterial diversity in the sequence datasets.

152           A common observation across the datasets was that samples with phyla that  
153 showed large deviation from the mean were predominantly from the SVD conditions.  
154 Yet, these shifts were not consistent across replicate samples or with sampling date (Fig.  
155 4). In this regard, no phylum level taxonomic bins were found to be significantly different  
156 in relative abundance when tested for either date of sampling or vegetation status. Thus,  
157 these data suggest a part of the sediment microbial community response to SVD is to  
158 increase the taxonomic heterogeneity between samples, rather than a consistent shift of  
159 specific taxonomic ranks.

160

161 *Differentially abundant OTUs due to site*

162           A total of 23 OTU's (97% sequence identity) were identified as significantly  
163 different in relative abundance due to site, 9 significantly enriched at Hammonasset and  
164 14 significantly enriched at Narragansett (Fig. 5). The differentially abundant OTUs  
165 belonged to five phyla and could be further classified to 12 taxonomic ranks representing  
166 the deepest level to which the OTUs could be reliably assigned (Table S1). There was no  
167 obvious pattern in the taxonomy of the differentially abundant OTUs. In fact, several

168 OTUs were identified to taxa that were significantly more abundant in both of the field  
169 sites. For instance, two OTUs identified as significantly more abundant at Hammonasset  
170 were classified to the genus *Calothrix* along with one of the OTUs that was enriched at  
171 Narragansett (Table S1). In this respect, these data suggest that at least a portion of the  
172 differentially abundant OTUs due to site may represent functionally redundant species  
173 adapted to the local edaphic factors.

174

#### 175 *Differentially abundant OTUs due to sampling date*

176 Samples were collected in July and October to test for temporal dynamics in the  
177 sediment communities. Overall, the majority of OTUs did not show a large change in  
178 relative abundance, rarely surpassing a two-fold difference between sampling dates (Fig.  
179 6). None of the OTUs were identified as significantly different in abundance. Thus, these  
180 data suggest that sampling date was a small factor in driving sediment community  
181 structure. This further matches the ordination results in which sampling date was not a  
182 significant factor in sample clustering (Fig. 2).

183

#### 184 *Differentially abundant OTUs due to vegetation status*

185 OTU abundance among the samples differing in vegetation status was  
186 investigated (Fig. 7). Large portions of the most abundant OTUs in the datasets were  
187 present in roughly equal abundance between all three vegetation conditions (inner  
188 triangle Fig. 7). Additionally, no OTUs were identified as significantly different due to  
189 vegetation status at either site (ellipses Figure 7). Yet, there was a clear trend of certain  
190 OTUs being more abundant in the vegetated sites (both healthy and edge), with few

191 OTUs showing enrichment in the SVD sediments. Thus, these data suggest that there are  
192 certain OTUs that trend toward being more abundant in the vegetated samples even if  
193 they did not rise to the level of significance. When taxonomy was mapped onto the  
194 OTUs, there was no readily apparent pattern in the OTUs that were more abundant in the  
195 vegetated sites as they were represented by multiple phyla (Fig. 7).

196

## 197 **Discussion**

198 The results of this study demonstrate edaphic factors related to geography were a  
199 larger driver of sediment community composition than the date of sampling or vegetation  
200 removal by SVD. Sediments from Narragansett had higher soil moisture, greater  
201 electrical conductivity, and higher C and N content, indicating that tidal waters may have  
202 more frequently inundated the Narragansett sites (Table 1). While sediments were  
203 collected systematically along perpendicular transects from tidal creeks at both sites, it is  
204 possible that Narragansett SVD patches occurred lower in the tidal frame and thus were  
205 wetter, saltier, and enriched in organic matter, key factors driving microbial community  
206 composition.

207 Previous studies have similarly found that geography is a large driver of bacterial  
208 community composition. Regional differences in Louisiana salt marshes were at least as  
209 large of a predictor of bacterial community composition as those between the rhizosphere  
210 of different plants (*S. alterniflora* and *Juncus roemerianus*; (20)). Similarly, ammonia-  
211 oxidizing communities (bacteria and archaea) showed larger differences between regions  
212 associated with soil moisture and nitrogen content than due to contamination during the  
213 Deepwater Horizon oil spill (21). Despite biogeography being a large influence on

214 sediment microbial communities, the structure of the sediment microbial communities  
215 was similar between the two field sites, being composed of the same dominant taxa (Fig.  
216 4), harboring similar levels of microbial diversity (Fig. 3), and only a relatively small  
217 number of OTUs being identified as significantly different in relative abundance between  
218 the sites (Fig. 5). A subset of the differentially abundant OTUs belonged to taxonomic  
219 groups specifically enriched in a certain field site. For example, an OTU identified to the  
220 genus *Mariprofundus* was enriched at Hammonasset (Table S1). These organisms have  
221 been associated with a role in iron oxidation in marine systems (22), and may point to  
222 differences in iron cycling between the sites. In contrast, several OTUs belonged to  
223 taxonomic ranks identified as more abundant in both field sites (Table S2). This could  
224 indicate that the differentially abundant taxa are largely functionally redundant but have  
225 adapted to the different biogeographic and edaphic factors that differentiate the two  
226 wetlands.

227 Coastal wetlands are temporally dynamic systems. Diurnal cycles in the tidal  
228 cycle, light, and photosynthesis rates drive changes in the magnitude of sediment  
229 respiration (23). Up to 76% of the detectable methane emissions from coastal wetland  
230 sediments are released during tidal immersion (24). Finally, seasonal patterns result in  
231 large alterations in a multitude of environmental factors, including temperature and plant  
232 physiology. Carbon flux from sediments is generally lower in the non-growing seasons,  
233 even when accounting for lower average temperatures (25) and plant activity in summer  
234 may regulate biogeochemical processes such as iron cycling (26). Thus, these data  
235 support that coastal sediment microbial activity is largely driven by biotic and abiotic  
236 factors that vary at a variety of time scales. However, studies characterizing temporal

237 patterns in microbial community assembly are notably sparse (27–29). We collected  
238 samples in July and October to investigate if the sediment microbial communities showed  
239 significant changes in composition related to season. Date of sampling was insignificant  
240 as a factor clustering the sequence datasets (Fig. 2) and the OTUs in the datasets were  
241 present in similar abundances at both time points with no OTUs being identified as  
242 significantly different in abundance due to sample date (Fig. 6). Taken together, these  
243 data suggest that the sediment microbial communities were largely similar in summer and  
244 fall samples, suggesting a limited role for seasonal dynamics in shaping the sediment  
245 communities. The samples were limited to a two-point time course therefore a finer-  
246 grained analysis may be required to disentangle a more nuanced response of these  
247 communities to temporal cycles. Yet these observations suggest that while microbial  
248 activity is responsive to the temporal dynamics in coastal wetlands, alterations in activity  
249 may be a poor predictor of community composition.

250       Finally, we employed the development of SVD as a natural experiment to assess  
251 the impact of an ecosystem disturbance on the sediment communities. At a landscape  
252 scale, the complete loss of vegetation appears to be a dramatic disturbance that would  
253 presumably translate into similarly large shifts in the sediment microbial communities.  
254 We previously showed that sites at Hammonasset experiencing SVD supported  
255 significantly lower populations of bacteria within the phylum *Bacteroidetes* and an  
256 elevated relative abundance of sulfate reducing bacteria (19). Yet, in this study no OTUs  
257 were identified as significantly different in relative abundance. The lack of significant  
258 differences could be due to the relatively low replication per individual sample date and  
259 site, the depth of sequencing, or the added variability of identifying differences between

260 samples collected on different dates. It is important to note, that while this study did not  
261 identify any OTUs significantly altered in abundance due to SVD, that does not indicate  
262 that there was no effect on the sediment communities. For example, CAP analysis  
263 identified a significant difference in the clustering of samples under different vegetation  
264 statuses (Fig. 2), the taxonomic makeup of the sediment communities at the phylum level  
265 was more heterogeneous in the SVD samples (Fig. 4), and there was a clear trend in  
266 OTUs that were enriched in the vegetated sites (edge and healthy) compared to SVD sites  
267 (Fig. 7). These data indicate that to the extent that there are shifts in the microbial  
268 communities due to SVD, they are likely limited to relatively rare community members  
269 and do not involve large shifts in relative abundance. The practical relevance of these  
270 observations is that the sediment microbial communities are also likely to respond well to  
271 any restoration efforts. For example, we previously demonstrated that SVD-affected  
272 sediments are capable of maintaining *S. alterniflora* germination and growth in  
273 greenhouse experiments (19). In this respect, we propose that restoration efforts for SVD-  
274 affected sites should primarily focus on the plant communities, as any alterations in the  
275 sediment microbial communities do not appear to have any deleterious effects on plant  
276 health.

277         A multitude of studies have similarly found that disturbance can lead to relatively  
278 small shifts in community composition of salt marsh sediment communities. For instance,  
279 increasing nitrogen loading to wetland sediments caused decreases in the metabolically  
280 active microbial populations without a concurrent alteration in the total community  
281 composition (30) or may be generally limited to specific nitrogen cycling populations  
282 (31). Even reciprocal transplants between salt marshes resulted in negligible changes in

283 sediment microbial communities (32). A metagenomic survey of two tidal creeks, one of  
284 which had received more than 40 years of sewage effluent from its headwaters, found  
285 little difference in the taxonomic profile of sediment communities but significant  
286 differences in the abundance of nitrogen cycling genes, suggesting shifts in the functional  
287 potential of the community without concurrent shifts in community membership (33). In  
288 this regard, sediment microbial communities have proven themselves to be resilient to  
289 disturbance.

290

## 291 **Conclusion**

292 Microbial communities are responsible for many of the ecosystem functions of  
293 coastal wetlands, particularly those for carbon sequestration and storage. Thus,  
294 characterizing the resiliency of these communities to disturbance and their natural  
295 variation with biogeography and time will be central to modeling their activities, and  
296 future in a changing environment. In this study, we show that the sediment microbial  
297 communities were relatively unaffected by an ecosystem disturbance, vegetation removal  
298 by SVD, at two different wetlands. Furthermore, temporal patterns in the community  
299 were small with little change in the composition of the communities between summer and  
300 fall. This suggests that the taxonomic makeup of the sediment microbial community was  
301 relatively stable in the face of seasonal dynamics and disturbance. These data support that  
302 the taxonomic makeup of sediment microbial communities are largely resilient to diverse  
303 environmental perturbations and future work may need to focus more specifically on the  
304 metabolic activities of the microbial populations.

305

## 306 **Materials and Methods**

### 307 *Field sampling*

308 Sediment samples consisted of *ca.* 5g of material collected with an ethanol-  
309 sterilized spatula. Sediments were collected from the upper 1 cm to focus on surface  
310 communities. The sediment samples were transferred to Whirl-Pak™ bags, placed on dry  
311 ice in a cooler, and transported to the Connecticut Agricultural Experiment Station (New  
312 Haven, CT) where they were stored at -80°C until DNA extraction.

313

### 314 *Sediment chemistry*

315 Sediment samples were stored frozen (-18°C) and thawed prior to analysis. Soils were  
316 sieved through a 2-mm mesh screen to remove belowground biomass and subsamples  
317 were analyzed for several sediment parameters. Soil pH and electrical conductivity were  
318 estimated on 10g subsamples diluted with 50 mL of deionized water and quantified using  
319 Orion Star A215 pH Conductivity Meter Orion with Ross Ultra pH/ATC Triode  
320 (8157BNUMD) and Orion Conductivity Cell (013005MD) probes. We dried subsamples  
321 at 105°C for >24hours and then weighed to estimate soil moisture. Subsamples were also  
322 pulverized in a ball-mill, rolled in tins, and analyzed for %C and %N (Costech ECS 4010  
323 CN Analyzer). Every ten samples we ran analytical triplicates to examine sample  
324 heterogeneity and observed <20% standard deviation for all soil parameters.

325

### 326 *DNA extraction, 16S rRNA gene amplification, and sequencing*

327 Samples were processed as described previously (19, 34). Briefly, total  
328 environmental DNA was extracted from sediments using the DNeasy PowerSoil Kit



329 (Qiagen), using standard protocols. DNA extractions were verified by gel electrophoresis.  
330 16S rRNA genes were amplified with the universal primers 515F and 806R (35), which  
331 also included Illumina adaptor sequence. Cycling conditions were as follows: Initial  
332 denaturation 95°C for 3 min; 35 cycles of 95°C for 45 s, 55°C for 60 s, 72°C for 60 s; a  
333 final extension at 72°C for 10 min. PCR amplification was checked by gel  
334 electrophoresis, verifying a *ca.* 300 b.p. amplification product. PCR products were  
335 purified using the QIAquick PCR purification kit (Qiagen). Sequence indexing was  
336 performed using the index PCR procedure, employing the Nextera DNA Library Prep Kit  
337 (Illumina Inc., San Diego, CA). Following indexing, PCR amplicons were purified as  
338 above and pooled in equal molar concentrations (1 µg). The resulting DNA was  
339 sequenced on the Illumina HiSeq platform at the Yale Center for Genome Analysis with  
340 standard protocols on the HiSeq2500 employing paired end 2 × 150 chemistry.

341

#### 342 *Sequence processing*

343 Paired end sequences were assembled into contigs using the `make.contigs`  
344 command with default parameters in the `mothur` (36) software package, only retaining  
345 contigs of at least 291 bases in length. Each contig was further screened to remove any  
346 sequences with any ambiguous nucleotide calls or homopolymers of  $\geq 7$  bases. Potentially  
347 chimeric sequences were identified with the `mothur` implementation of `VSEARCH` (37)  
348 and removed from the dataset. Sequences were clustered into operational taxonomic units  
349 (OTUs) with the `OptiClust` algorithm in `mothur` (38). For analyses of diversity and  
350 composition, an OTU definition of  $\geq 97\%$  sequence identity was employed. Taxonomic  
351 assignment of reads was performed with the `mothur` implementation of the Naïve

352 Bayesian Classifier (39) against the SILVA (40) ribosomal gene database as maintained  
353 by mothur. Sequences with confidence scores of  $\geq 80\%$  were considered to be reliably  
354 classified.

355

### 356 *Statistical analyses*

357 For each of the 6 sediment variables (pH, EC, soil moisture, soil %N, soil %C,  
358 soil C:N), we tested for normality with Shapiro-Wilks tests and log-transformed if  
359 necessary. We used a 3-way, interactive ANOVA (site \* vegetation type \* season); if  
360 there were no significant interactions (true in all cases, except soil C:N), we simplified to  
361 an additive ANOVA (site + type + season).

362 OTU abundance data was uploaded to the phyloseq R software package (41, 42)  
363 for calculation of ordination plots and calculations of alpha diversity. CAP analysis was  
364 performed on data randomly rarified to the sample size of the smallest sequence dataset  
365 (7,689 sequences). Inter-sample distances were calculated with the Bray-Curtis metric  
366 and PERMANOVA statistics were calculated with the Adonis function of the vegan R  
367 package (43). For testing for significant clustering of date and vegetation status samples  
368 the model included an interaction term to test if there was a significant interaction  
369 between the variables.

370 Differentially abundant OTUs were identified by calculating the log<sub>2</sub>-fold ratio  
371 using the negative binomial generalized linear framework of the DESeq2 software  
372 package (44). Unnormalized OTU count data was used for all tests. P-values were  
373 adjusted for multiple tests with a Benjamini–Hochberg false discovery rate correction,  
374 and a threshold P-value of 0.01 was used to prevent the likelihood of false positives. We

375 used the  $\log_2$ -fold ratio of the relative abundance and mean normalized counts to display  
376 differentially abundant OTUs in a Bland–Altman plot. The model for detecting  
377 differentially abundant OTUs accounted for the nested nature of the sampling as site +  
378 date + condition (vegetation status).

379

### 380 *Sequence availability*

381 All sequences generated in this study are available in the NCBI sequence read  
382 archive under the BioProject ID: PRJNA488460.

383

384

### 385 **Acknowledgements**

386 The authors would like to acknowledge Kenny Raposa and Henry Alves for field  
387 site access. We would also like to thank Dr. Wade Elmer and Peter Thiel for assistance in  
388 field sampling. This work was supported by the USDA National Institute of Food and  
389 Agriculture, Hatch project 1006211.

390

391

392

### 393 **References**

- 394 1. Mcleod E, Chmura GL, Bouillon S, Salm R, Björk M, Duarte CM, Lovelock CE,  
395 Schlesinger WH, Silliman BR. 2011. A blueprint for blue carbon: toward an  
396 improved understanding of the role of vegetated coastal habitats in sequestering  
397 CO<sub>2</sub>. *Front Ecol Environ* 9:552–560.

- 398 2. Bertness MD, Crain C, Holdredge C, Sala N. 2008. Eutrophication and Consumer  
399 Control of New England Salt Marsh. *Conserv Biol* 22:131–139.
- 400 3. Hopkinson CS, Cai W-J, Hu X. 2012. Carbon sequestration in wetland dominated  
401 coastal systems—a global sink of rapidly diminishing magnitude. *Curr Opin*  
402 *Environ Sustain* 4:186–194.
- 403 4. Blodau C. 2002. Carbon cycling in peatlands - A review of processes and controls.  
404 *Environ Rev* 10:111–134.
- 405 5. Picek T, Čížková H, Dušek J. 2007. Greenhouse gas emissions from a constructed  
406 wetland—Plants as important sources of carbon. *Ecol Eng* 31:98–106.
- 407 6. Chew ST, Gallagher JB. 2018. Accounting for black carbon lowers estimates of  
408 blue carbon storage services. *Sci Rep* 8:2553.
- 409 7. Armitage A, Fourqurean J. 2016. Carbon storage in seagrass soils: long-term  
410 nutrient history exceeds the effects of near-term nutrient enrichment. *FCE LTER*  
411 *J Artic.*
- 412 8. Nellemann C. 2009. Blue carbon: the role of healthy oceans in binding carbon: a  
413 rapid response assessment.
- 414 9. Schile LM, Kauffman JB, Crooks S, Fourqurean JW, Glavan J, Megonigal JP. Limits  
415 on carbon sequestration in arid blue carbon ecosystems. *Ecol Appl* 27:859–874.
- 416 10. Thomas S. 2014. Blue carbon: Knowledge gaps, critical issues, and novel  
417 approaches. *Ecol Econ* 107:22–38.

- 418 11. Elmer WH, Useman S, Schneider RW, Marra RE, LaMondia JA, Mendelssohn IA,  
419 Jiménez-Gasco MM, Caruso FL. 2013. Sudden vegetation dieback in Atlantic and  
420 Gulf Coast salt marshes. *Plant Dis* 97:436–445.
- 421 12. Alber M, Swenson EM, Adamowicz SC, Mendelssohn IA. 2008. Salt marsh  
422 dieback: An overview of recent events in the U.S. *Estuar Coast Shelf Sci* 80:1–11.
- 423 13. McKee KL, Mendelssohn IA, D. Materne M. 2004. Acute salt marsh dieback in the  
424 Mississippi River deltaic plain: a drought-induced phenomenon?: *Salt Marsh*  
425 *Dieback. Glob Ecol Biogeogr* 13:65–73.
- 426 14. Elmer WH. 2016. Pathogenic Microfungi Associated with *Spartina* in Salt  
427 Marshes, p. 615–630. *In* Li, D-W (ed.), *Biology of Microfungi*. Springer  
428 International Publishing, Cham.
- 429 15. Elmer WH, Marra RE. 2011. New species of *Fusarium* associated with dieback of  
430 *Spartina alterniflora* in Atlantic salt marshes. *Mycologia* 103:806–819.
- 431 16. Schultz RA, Anisfeld SC, Hill TD. 2016. Submergence and herbivory as divergent  
432 causes of marsh loss in Long Island Sound. *Estuaries Coasts* 1–9.
- 433 17. Raposa KB, McKinney RA, Wigand C, Hollister JW, Lovall C, Szura K, John A.  
434 Gurak J, McNamee J, Raithel C, Watson EB. 2018. Top-down and bottom-up  
435 controls on southern New England salt marsh crab populations. *PeerJ* 6:e4876.
- 436 18. Elmer WH. 2014. A tripartite interaction between *Spartina alterniflora* ,  
437 *Fusarium palustre*, and the purple marsh crab (*Sesarma reticulatum*) contributes

- 438 to sudden vegetation dieback of salt marshes in New England. *Phytopathology*  
439 104:1070–1077.
- 440 19. Elmer WH, Thiel P, Steven B. 2017. Response of Sediment Bacterial Communities  
441 to Sudden Vegetation Dieback in a Coastal Wetland. *Phytobiomes* 1:5–13.
- 442 20. Rietl AJ, Overlander ME, Nyman AJ, Jackson CR. 2016. Microbial Community  
443 Composition and Extracellular Enzyme Activities Associated with *Juncus roemerianus*  
444 and *Spartina alterniflora* Vegetated Sediments in  
445 Louisiana Saltmarshes. *Microb Ecol* 71:290–303.
- 447 21. Bernhard AE, Sheffer R, Giblin AE, Marton JM, Roberts BJ. 2016. Population  
448 Dynamics and Community Composition of Ammonia Oxidizers in Salt Marshes  
449 after the Deepwater Horizon Oil Spill. *Front Microbiol* 7.
- 450 22. Singer E, Emerson D, Webb EA, Barco RA, Kuenen JG, Nelson WC, Chan CS,  
451 Comolli LR, Ferriera S, Johnson J, Heidelberg JF, Edwards KJ. 2011.  
452 *Mariprofundus ferrooxydans* PV-1 the First Genome of a Marine Fe(II) Oxidizing  
453 Zetaproteobacterium. *PLOS ONE* 6:e25386.
- 454 23. Han G, Luo Y, Li D, Xia J, Xing Q, Yu J. 2014. Ecosystem photosynthesis regulates  
455 soil respiration on a diurnal scale with a short-term time lag in a coastal  
456 wetland. *Soil Biol Biochem* 68:85–94.

- 457 24. Bahlmann E, Weinberg I, Lavrič JV, Eckhardt T, Michaelis W, Santos R, Seifert R.  
458 2015. Tidal controls on trace gas dynamics in a seagrass meadow of the Ria  
459 Formosa lagoon (southern Portugal). *Biogeosciences* 12:1683–1696.
- 460 25. Han G, Sun B, Chu X, Xing Q, Song W, Xia J. 2018. Precipitation events reduce soil  
461 respiration in a coastal wetland based on four-year continuous field  
462 measurements. *Agric For Meteorol* 256–257:292–303.
- 463 26. Neubauer SC, Givler K, Valentine S, Megonigal JP. Seasonal Patterns and Plant-  
464 Mediated Controls of Subsurface Wetland Biogeochemistry. *Ecology* 86:3334–  
465 3344.
- 466 27. Gonzalez A, King A, Robeson II MS, Song S, Shade A, Metcalf JL, Knight R. 2012.  
467 Characterizing microbial communities through space and time. *Curr Opin*  
468 *Biotechnol* 23:431–436.
- 469 28. Widder S, Allen RJ, Pfeiffer T, Curtis TP, Wiuf C, Sloan WT, Cordero OX, Brown SP,  
470 Momeni B, Shou W, Kettle H, Flint HJ, Haas AF, Laroche B, Kreft J-U, Rainey PB,  
471 Freilich S, Schuster S, Milferstedt K, Meer JR van der, Großkopf T, Huisman J,  
472 Free A, Picioreanu C, Quince C, Klapper I, Labarthe S, Smets BF, Wang H, Fellows  
473 INI, Soyer OS. 2016. Challenges in microbial ecology: building predictive  
474 understanding of community function and dynamics. *ISME J* 10:2557–2568.
- 475 29. Gonze D, Coyte KZ, Lahti L, Faust K. 2018. Microbial communities as dynamical  
476 systems. *Curr Opin Microbiol* 44:41–49.

- 477 30. Kearns PJ, Angell JH, Howard EM, Deegan LA, Stanley RHR, Bowen JL. 2016.  
478 Nutrient enrichment induces dormancy and decreases diversity of active  
479 bacteria in salt marsh sediments. *Nat Commun* 7:12881.
- 480 31. Angell JH, Peng X, Ji Q, Craick I, Jayakumar A, Kearns PJ, Ward BB, Bowen JL.  
481 2018. Community Composition of Nitrous Oxide-Related Genes in Salt Marsh  
482 Sediments Exposed to Nitrogen Enrichment. *Front Microbiol* 9.
- 483 32. Angermeyer A, Crosby SC, Huber JA. 2018. Salt marsh sediment bacterial  
484 communities maintain original population structure after transplantation across  
485 a latitudinal gradient. *PeerJ* 6:e4735.
- 486 33. Graves CJ, Makrides E, Schmidt V, Giblin A, Cardon Z, Rand D. 2016. Functional  
487 responses of salt marsh microbial communities to long-term nutrient  
488 enrichment. *Appl Environ Microbiol* AEM.03990-15.
- 489 34. Wang F, Kaplan JL, Gold BD, Bhasin MK, Ward NL, Kellermayer R, Kirschner BS,  
490 Heyman MB, Dowd SE, Cox SB, Dogan H, Steven B, Ferry GD, Cohen SA,  
491 Baldassano RN, Moran CJ, Garnett EA, Drake L, Otu HH, Mirny LA, Libermann TA,  
492 Winter HS, Korolev KS. 2016. Detecting microbial dysbiosis associated with  
493 pediatric Crohn Disease despite the high variability of the gut microbiota. *Cell*  
494 *Rep* 14:945–955.
- 495 35. Caporaso JG, Lauber CL, Walters WA, Berg-Lyons D, Lozupone CA, Turnbaugh PJ,  
496 Fierer N, Knight R. 2011. Global patterns of 16S rRNA diversity at a depth of  
497 millions of sequences per sample. *Proc Natl Acad Sci* 108:4516–4522.



- 498 36. Schloss PD, Westcott SL, Ryabin T, Hall JR, Hartmann M, Hollister EB, Lesniewski  
499 RA, Oakley BB, Parks DH, Robinson CJ, Sahl JW, Stres B, Thallinger GG, Horn DJV,  
500 Weber CF. 2009. Introducing mothur: Open-source, platform-independent,  
501 community-supported software for describing and comparing microbial  
502 communities. *Appl Environ Microbiol* 75:7537–7541.
- 503 37. Rognes T, Flouri T, Nichols B, Quince C, Mahé F. 2016. VSEARCH: a versatile open  
504 source tool for metagenomics. *PeerJ* 4:e2584.
- 505 38. Westcott SL, Schloss PD. 2017. OptiClust, an Improved Method for Assigning  
506 Amplicon-Based Sequence Data to Operational Taxonomic Units. *mSphere*  
507 2:e00073-17.
- 508 39. Wang Q, Garrity GM, Tiedje JM, Cole JR. 2007. Naive Bayesian Classifier for Rapid  
509 Assignment of rRNA Sequences into the New Bacterial Taxonomy. *Appl Environ*  
510 *Microbiol* 73:5261–5267.
- 511 40. Quast C, Pruesse E, Yilmaz P, Gerken J, Schweer T, Yarza P, Peplies J, Glockner FO.  
512 2013. The SILVA ribosomal RNA gene database project: improved data  
513 processing and web-based tools. *Nucleic Acids Res* 41:D590–D596.
- 514 41. R Core Team. 2013. R: A language and environment for statistical computing.  
515 Vienna, Austria.
- 516 42. McMurdie PJ, Holmes S. 2013. phyloseq: an R package for reproducible  
517 interactive analysis and graphics of microbiome census data. *PloS One* 8:e61217.

518 43. Dixon P, Palmer MW. 2003. VEGAN, a package of R functions for community  
519 ecology. *J Veg Sci* 14:927–930.

520 44. Love MI, Huber W, Anders S. 2014. Moderated estimation of fold change and  
521 dispersion for RNA-seq data with DESeq2. *Genome Biol* 15:550.

522

523

524

525

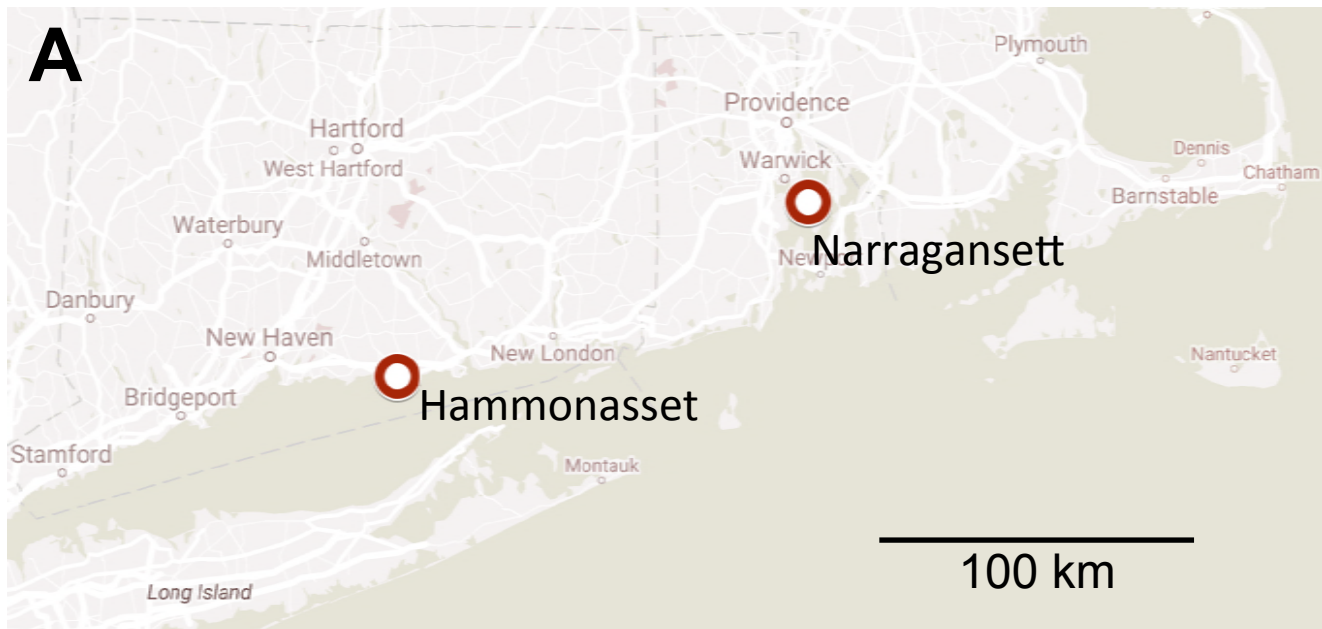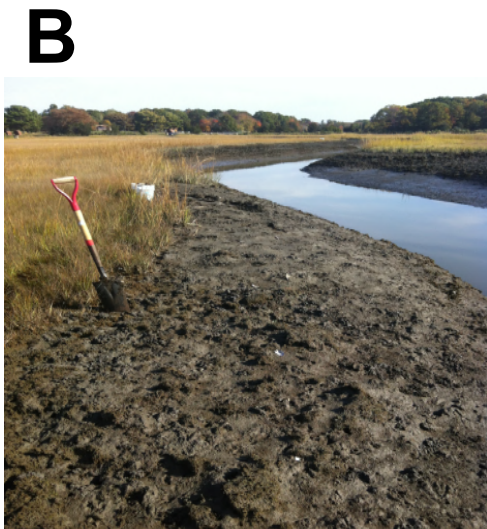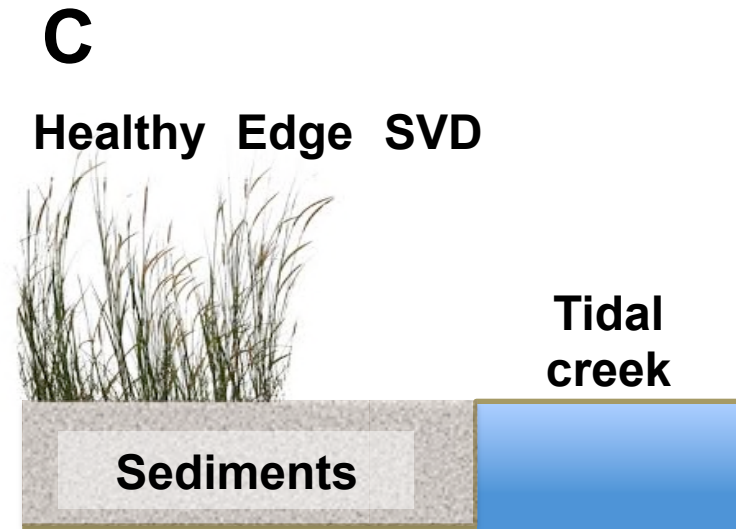

**Figure 1.** A). Map of the East coast of the USA showing sampling sites. The sites were approximately 125 km apart B). Photograph of a site experiencing SVD at Hammonasset Beach State Park. B). Schematic diagram displaying the sampling strategy. Samples consisted of a transect originating at the SVD sites, which occur adjacent to the tidal creeks. Edge samples were collected from sediments in the region where vegetation began to grow, and healthy sediments were collected from sites within stands of flourishing *S. alterniflora* approximately 1 meter distant from the edge sample.

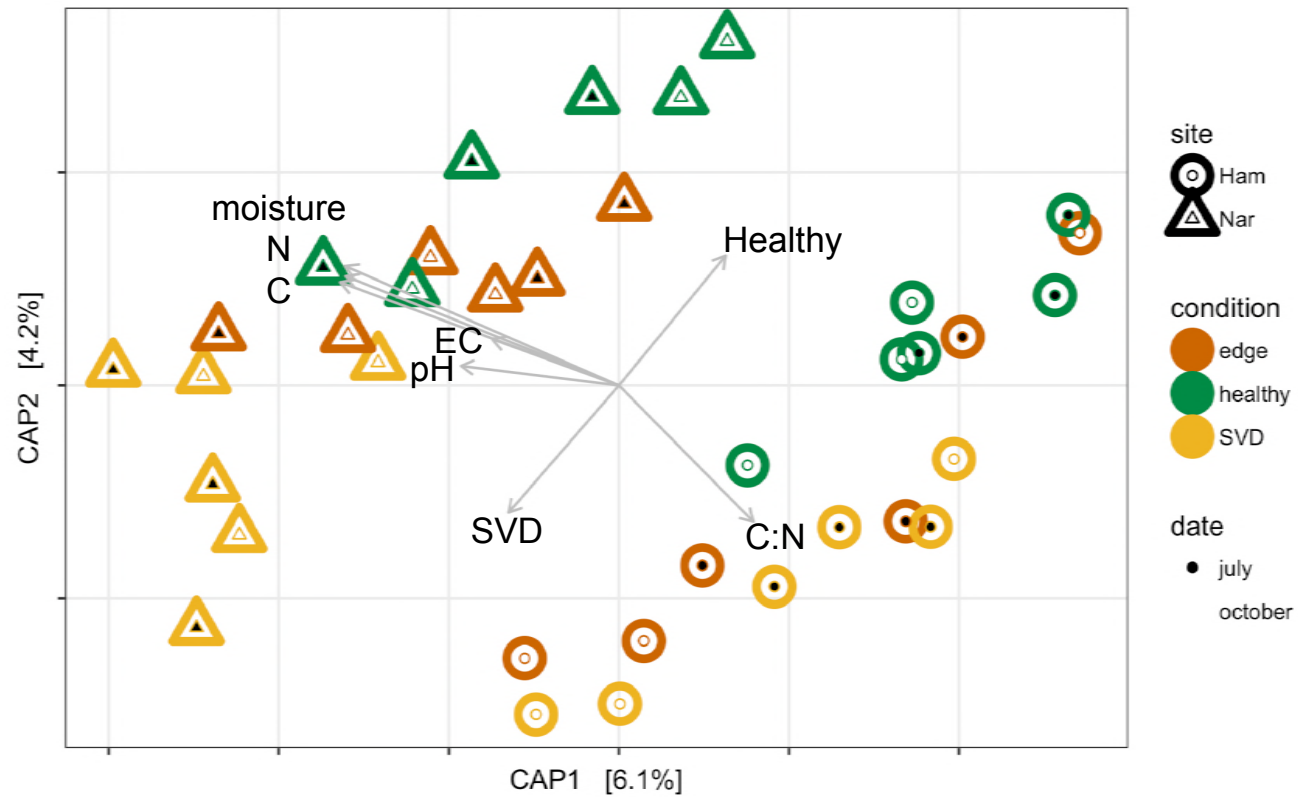

**Figure. 2.** Canonical Analysis of Principal Coordinates (CAP) of OTU abundance data in the sequence datasets. Inter-sample distances were calculated with the Bray-Cutis metric using rarefied OTU count data. The percent variance explained by each of the CAP axes is indicated. Explanatory variables are indicated by arrows (data presented in Table 1).

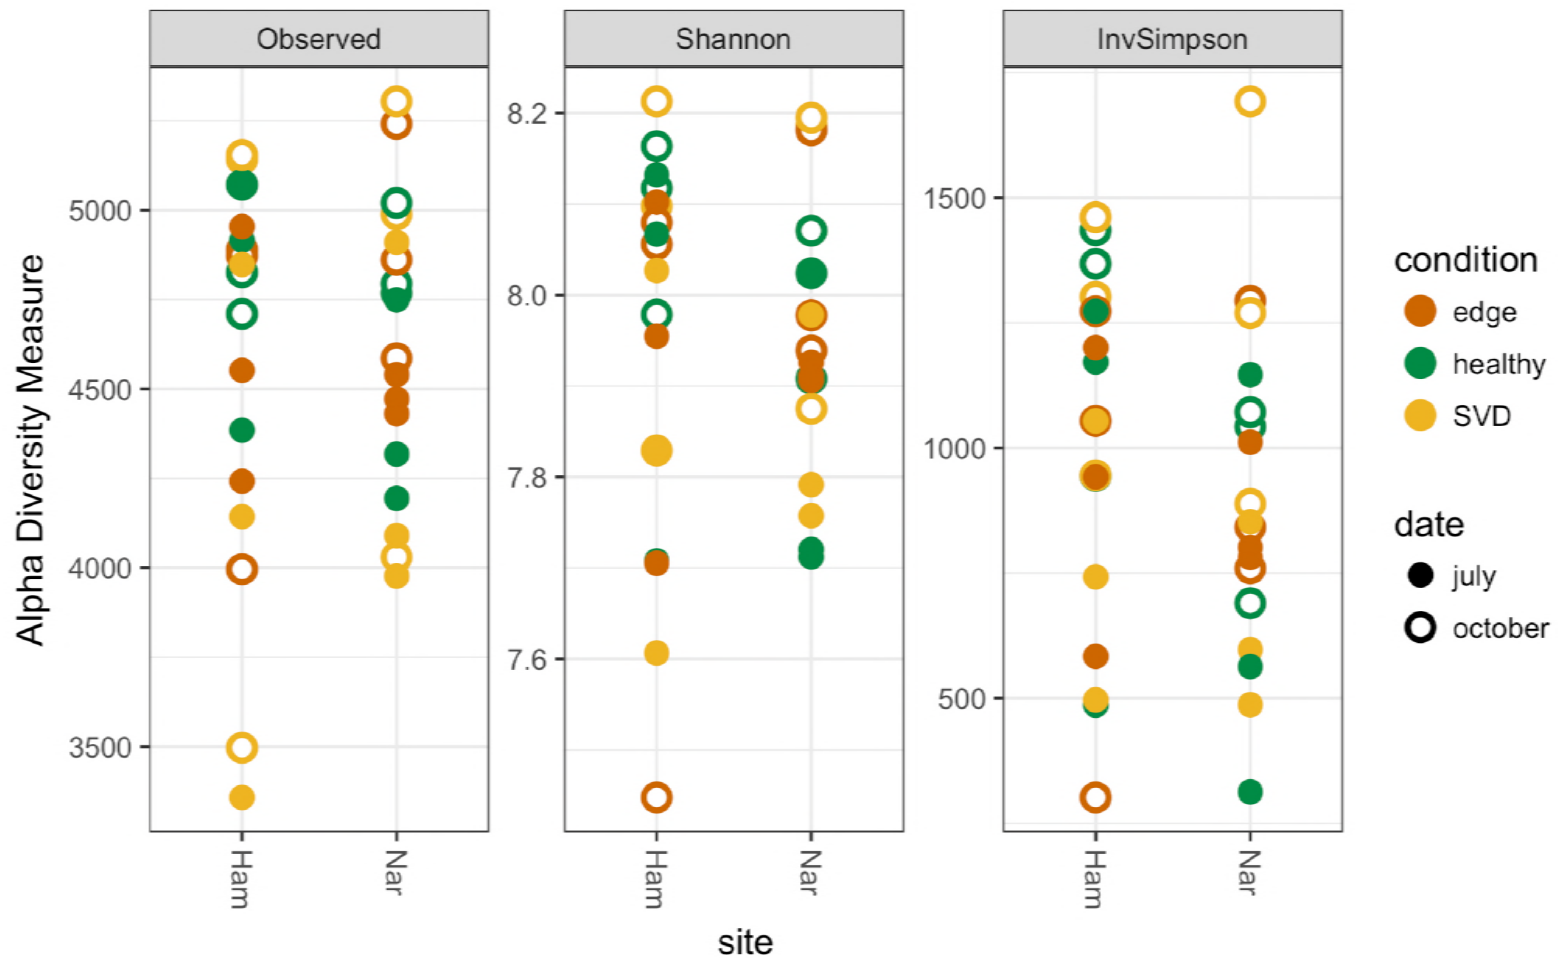

**Figure. 3.** Alpha diversity of sequence datasets, separated by field site (Ham=Hammonasset, Nar=Narragansett). Three diversity indices were calculated using OTU abundance in the rarefied datasets. The number of observed OTUs (Observed), Shannon’s diversity index (Shannon), and the Inverse Simpson’s Index (InvSimpson). Each point represents the value from a single dataset.

## A. Hammonasset

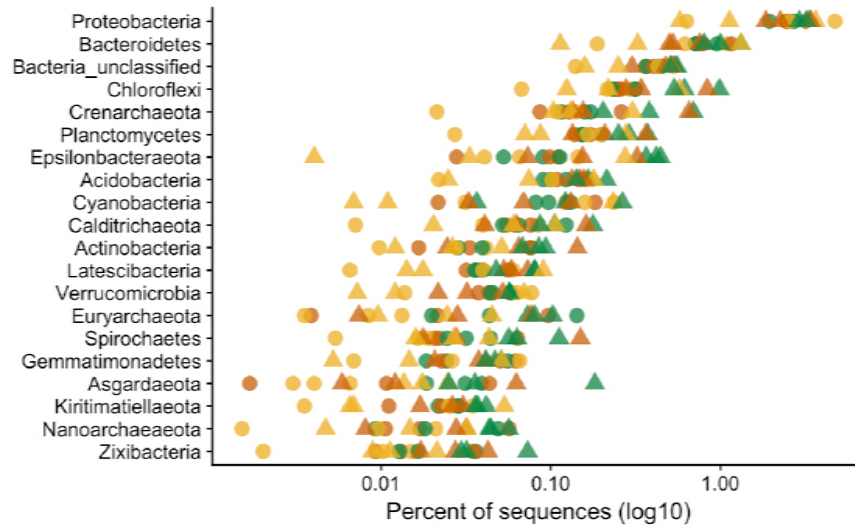

### Legend

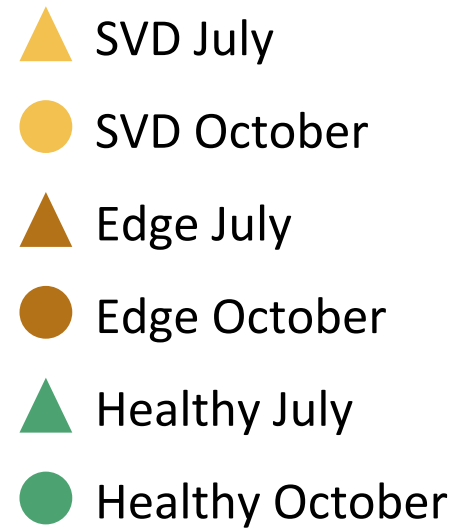

## B. Narragansett

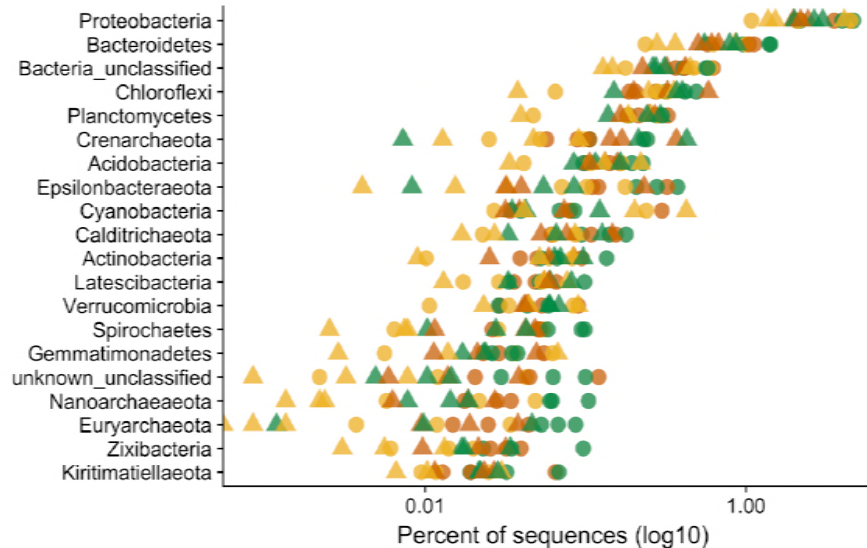

**Figure 4.** Phylum level taxonomic bins in the sequence datasets, separated by field site. Each point is the average of three replicate samples. Only the 20 most numerically abundant phyla (sorted by abundance across all samples for each site) are displayed.

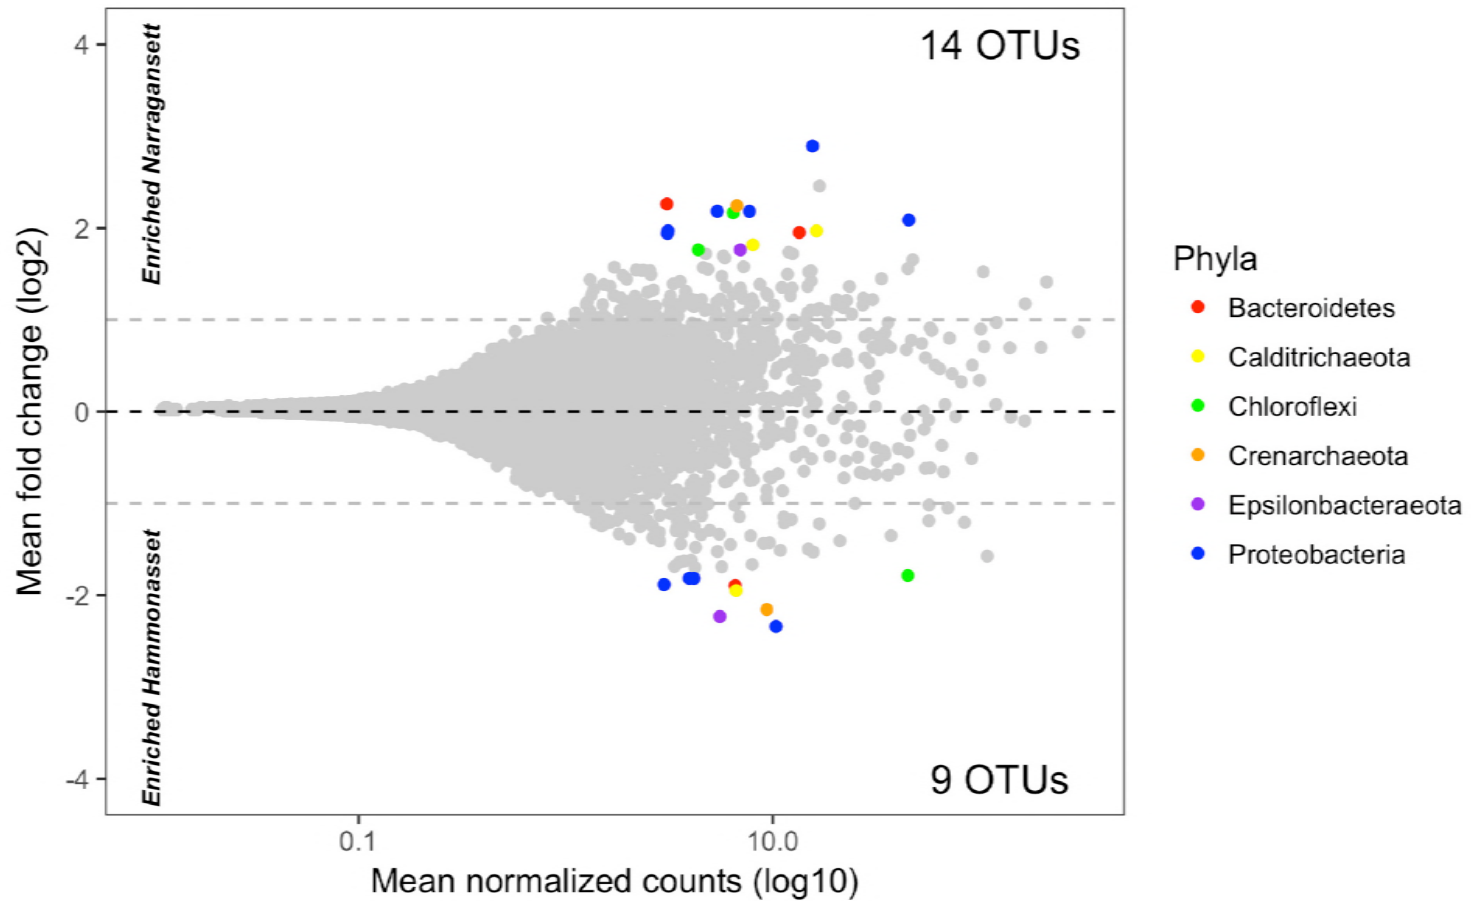

**Figure. 5.** Mean OTU counts versus mean fold change in abundance for each OTU in the dataset. Points represent the mean values for 36 samples. OTUs with a significant difference in abundance are colored by the phylum to which they were classified. The dashed lines indicate a two-fold difference in relative abundance between sites. The number of OTUs enriched at each site is indicated in the panel. A full list of the differentially abundant OTUs is presented in Table S1.

## Hammonasset

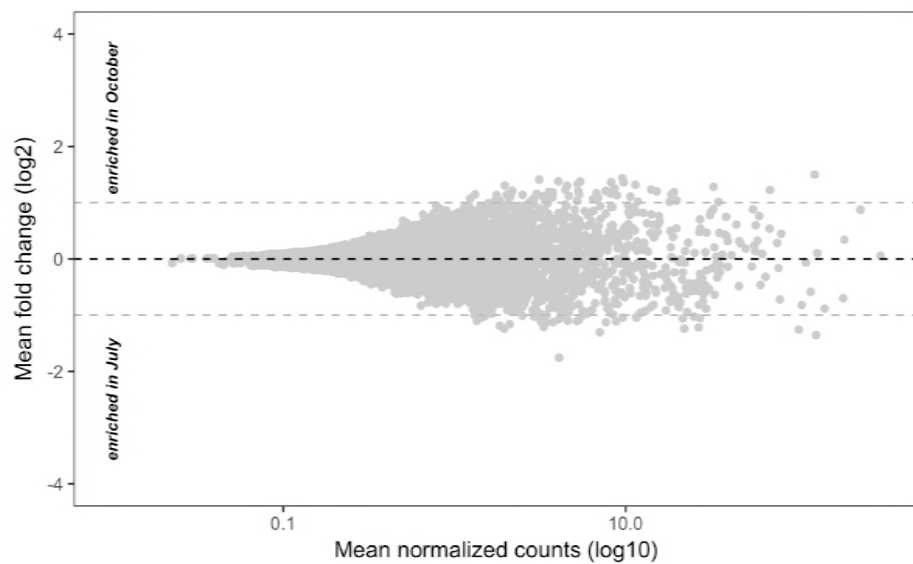

## Narragansett

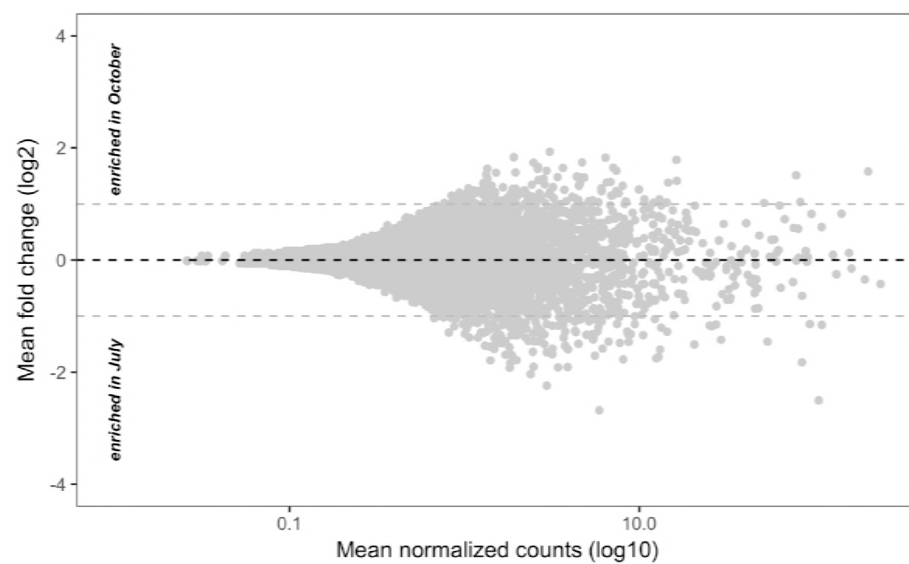

**Figure. 6.** Mean OTU counts versus mean fold change in abundance for each OTU in the dataset grouped by site. Points represent the mean values for 18 samples. No OTUs were found to be significantly different in abundance. The dashed lines indicate a two-fold difference in relative abundance between sample dates.



## Hammonasset

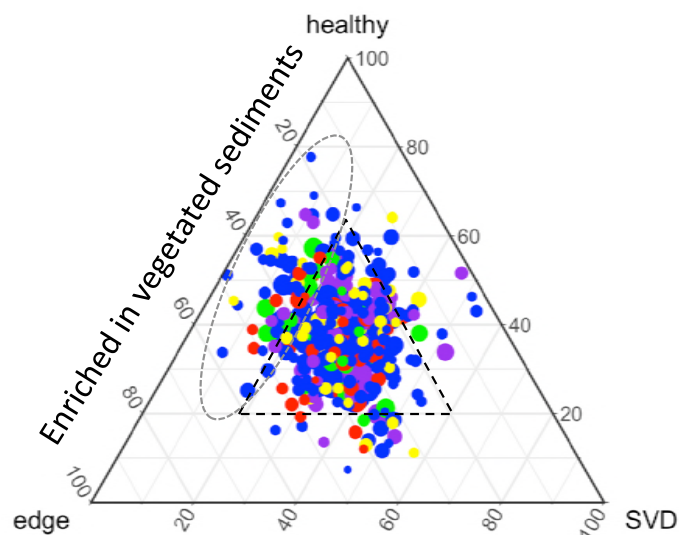

## Narragansett

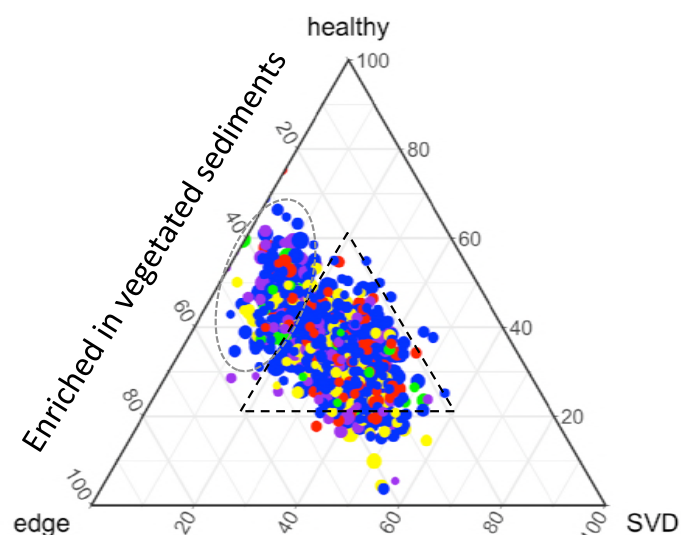

mean counts

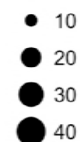

phylum

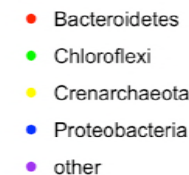

**Figure. 7.** Ternary diagrams displaying relative abundance of OTUs among the three vegetation conditions. The 500 most abundant OTUs displayed and colored based on the phylum to which they were classified (the four most common phyla are indicated, with remainder assigned to “other”). The size of the point indicates the mean count of each OTU across the datasets (n=18). Only OTUs with at a sequence count of at least 10 were retained to examine OTUs that could potentially be shared between all three conditions. The central triangle denotes the centered mean of the diagram and thus OTUs present in each condition in roughly equal relative abundance. The ellipses denote OTUs more abundant in vegetated samples (edge and healthy) and is a visual aid only. Note that no OTUs were significantly different in abundance due to vegetation condition.

**Table 1.** Sediment characteristics (mean  $\pm$  SE) of two northeastern (USA) coastal wetlands affected by SVD.

|            | Hammonasset     |                 |                 | Narragansett    |                 |                 |
|------------|-----------------|-----------------|-----------------|-----------------|-----------------|-----------------|
|            | <u>SVD</u>      | <u>Edge</u>     | <u>Healthy</u>  | <u>SVD</u>      | <u>Edge</u>     | <u>Healthy</u>  |
| pH         | 6.47 $\pm$ 0.20 | 6.86 $\pm$ 0.17 | 6.86 $\pm$ 0.14 | 6.96 $\pm$ 0.10 | 7.03 $\pm$ 0.10 | 6.93 $\pm$ 0.14 |
| EC (mS/cm) | 5.82 $\pm$ 0.26 | 5.95 $\pm$ 0.22 | 5.42 $\pm$ 0.45 | 6.24 $\pm$ 0.65 | 6.66 $\pm$ 0.33 | 7.26 $\pm$ 0.16 |
| % moisture | 52.0 $\pm$ 1.0  | 56.6 $\pm$ 2.8  | 56.6 $\pm$ 1.5  | 70.5 $\pm$ 1.8  | 71.0 $\pm$ 1.3  | 73.3 $\pm$ 1.5  |
| %C         | 6.0 $\pm$ 0.2   | 6.2 $\pm$ 0.4   | 6.0 $\pm$ 0.2   | 12.5 $\pm$ 1.0  | 12.5 $\pm$ 1.1  | 12.7 $\pm$ 0.8  |
| %N         | 0.39 $\pm$ 0.01 | 0.41 $\pm$ 0.03 | 0.40 $\pm$ 0.02 | 0.88 $\pm$ 0.06 | 0.89 $\pm$ 0.07 | 0.91 $\pm$ 0.04 |
| C:N        | 15.5 $\pm$ 0.3  | 15.1 $\pm$ 0.3  | 15.0 $\pm$ 0.3  | 14.2 $\pm$ 0.3  | 14.0 $\pm$ 0.2  | 13.9 $\pm$ 0.2  |

ANOVA analysis indicated all parameters except pH differed ( $p \leq 0.05$ ) among sites (Hammonasset, Narragansett), but there were no differences among vegetation zones (SVD, Edge, Healthy), or by season (summer vs. fall; not shown here).
